# Supplementary figures and images for: A new triboelectric nanogenerator based on a multi-material stacking structure achieves efficient power conversion from discrete mechanical movement
Source: Royal Society of Chemistry journal article supplement (doi:10.1039/d3nr04060g), 2023-12-04

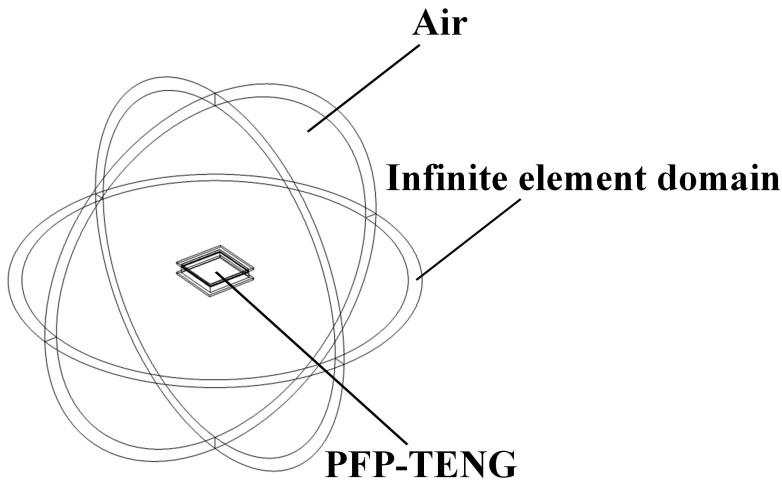

Supplement: d3nr04060g10.pdf [file d3nr04060g10.pdf]

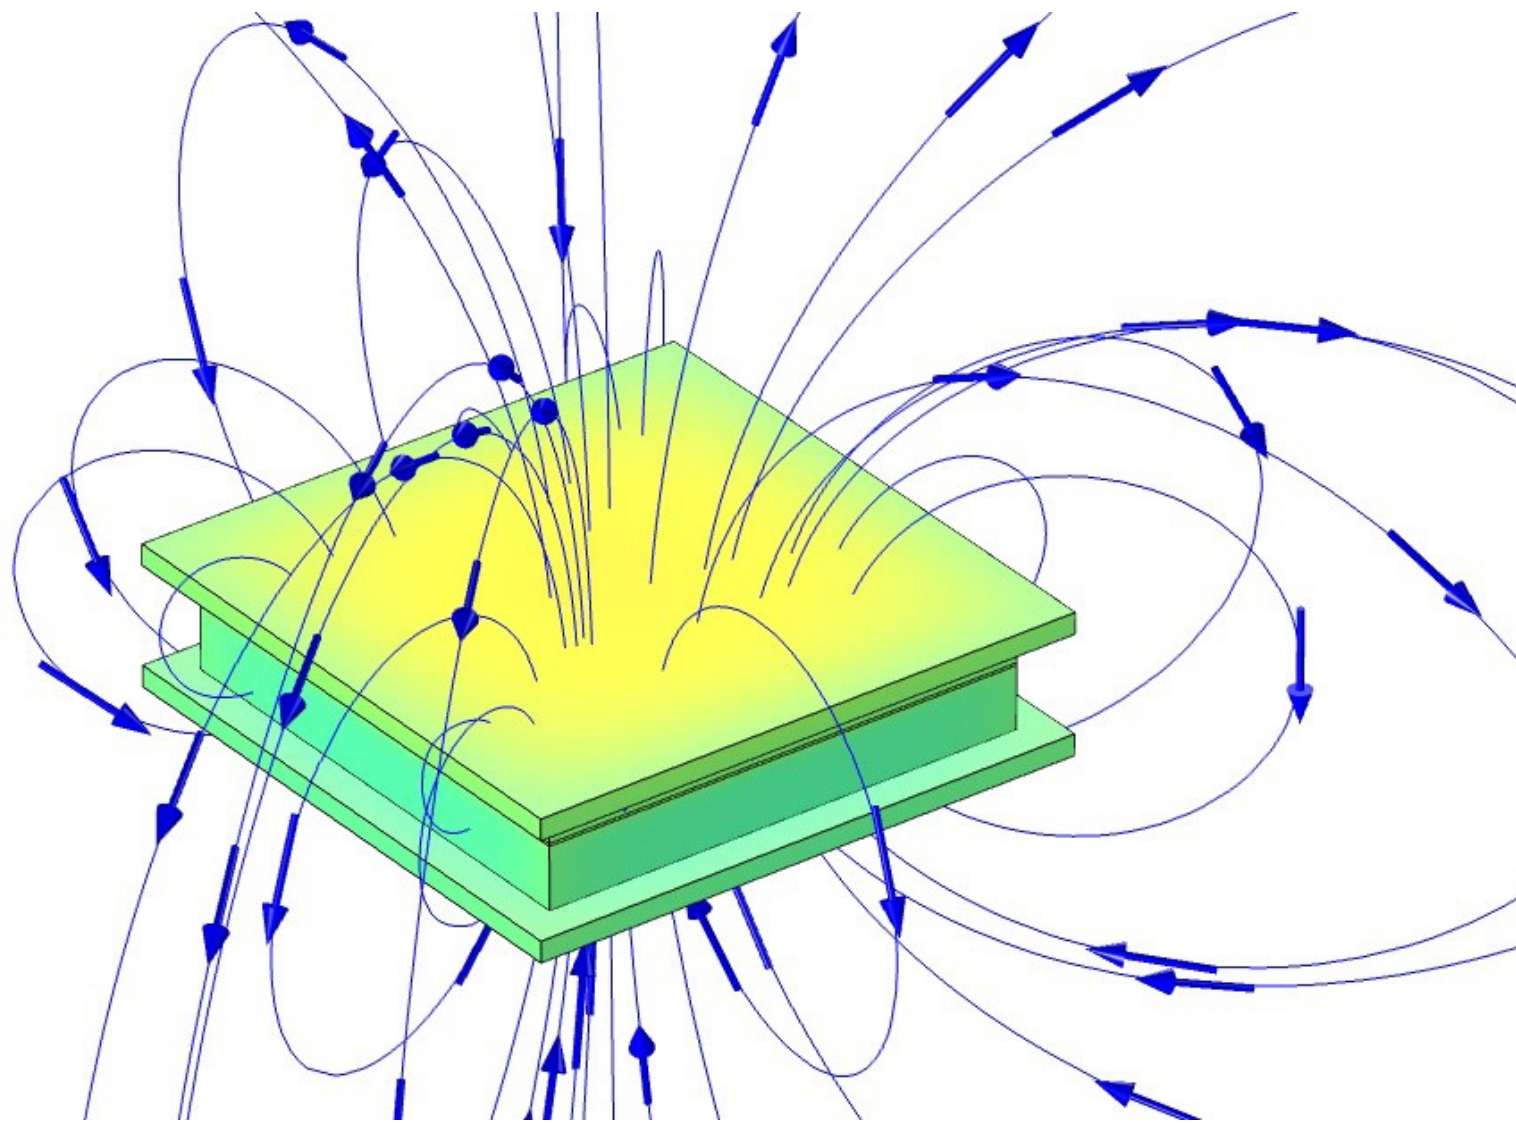

Supplement: d3nr04060g11.pdf [file d3nr04060g11.pdf]

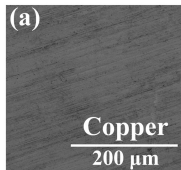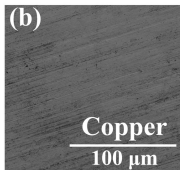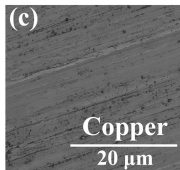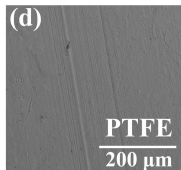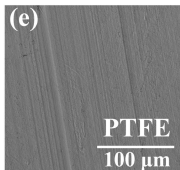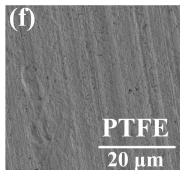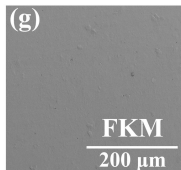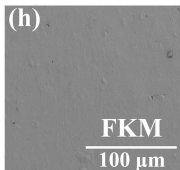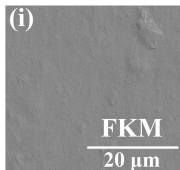

Supplement: d3nr04060g3.pdf [file d3nr04060g3.pdf]

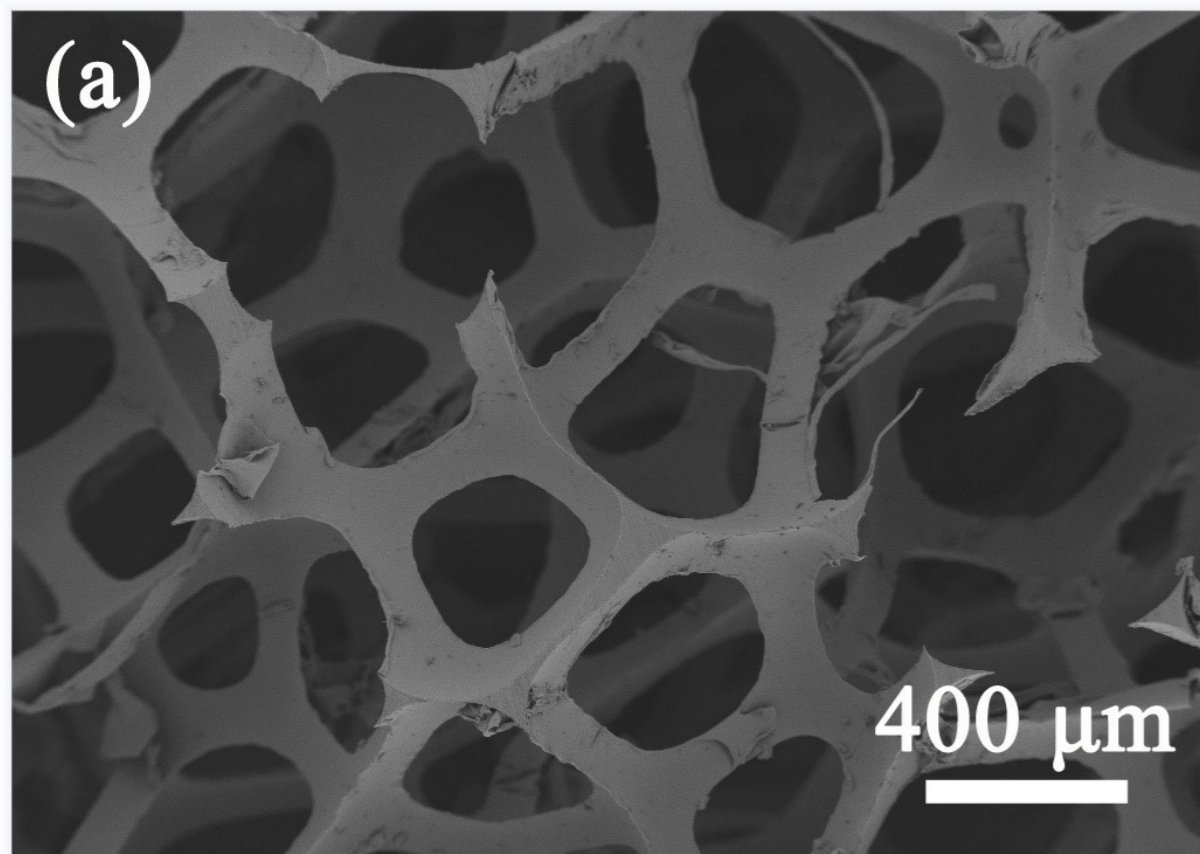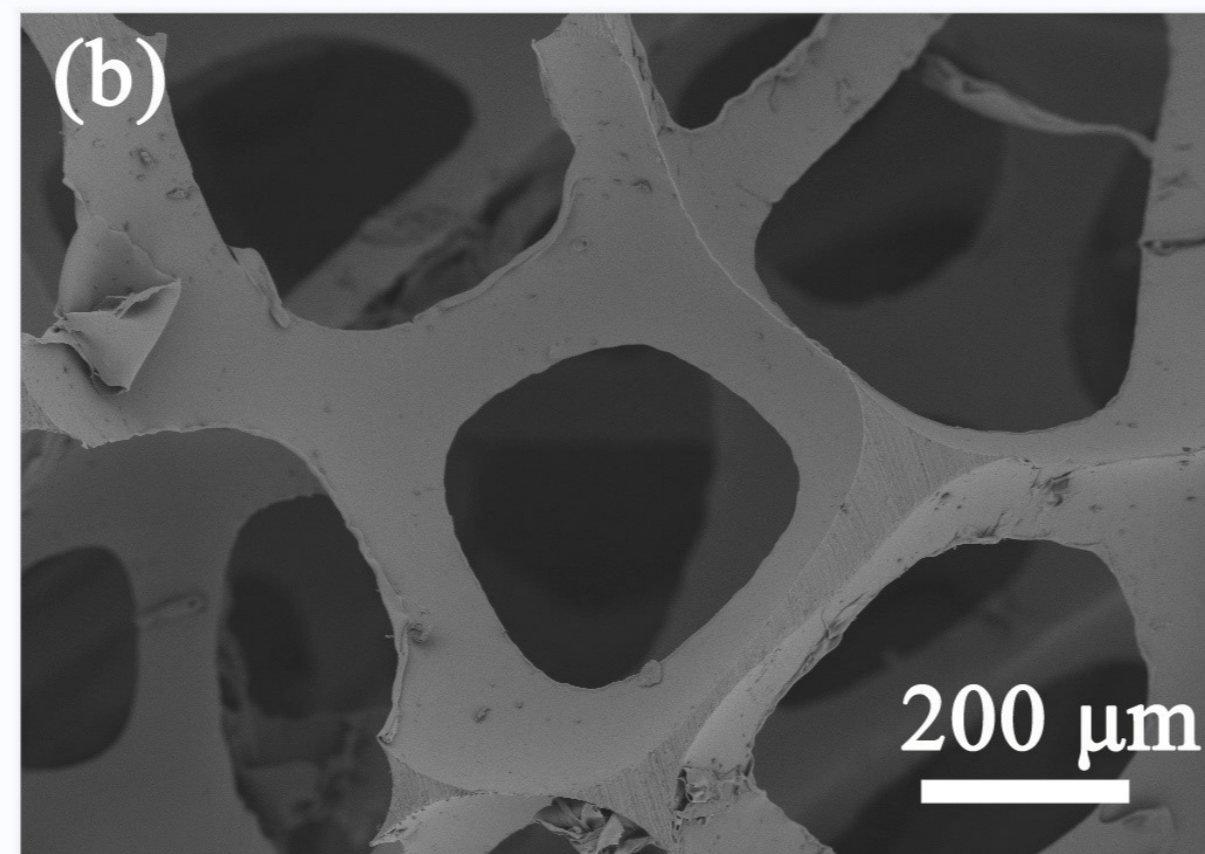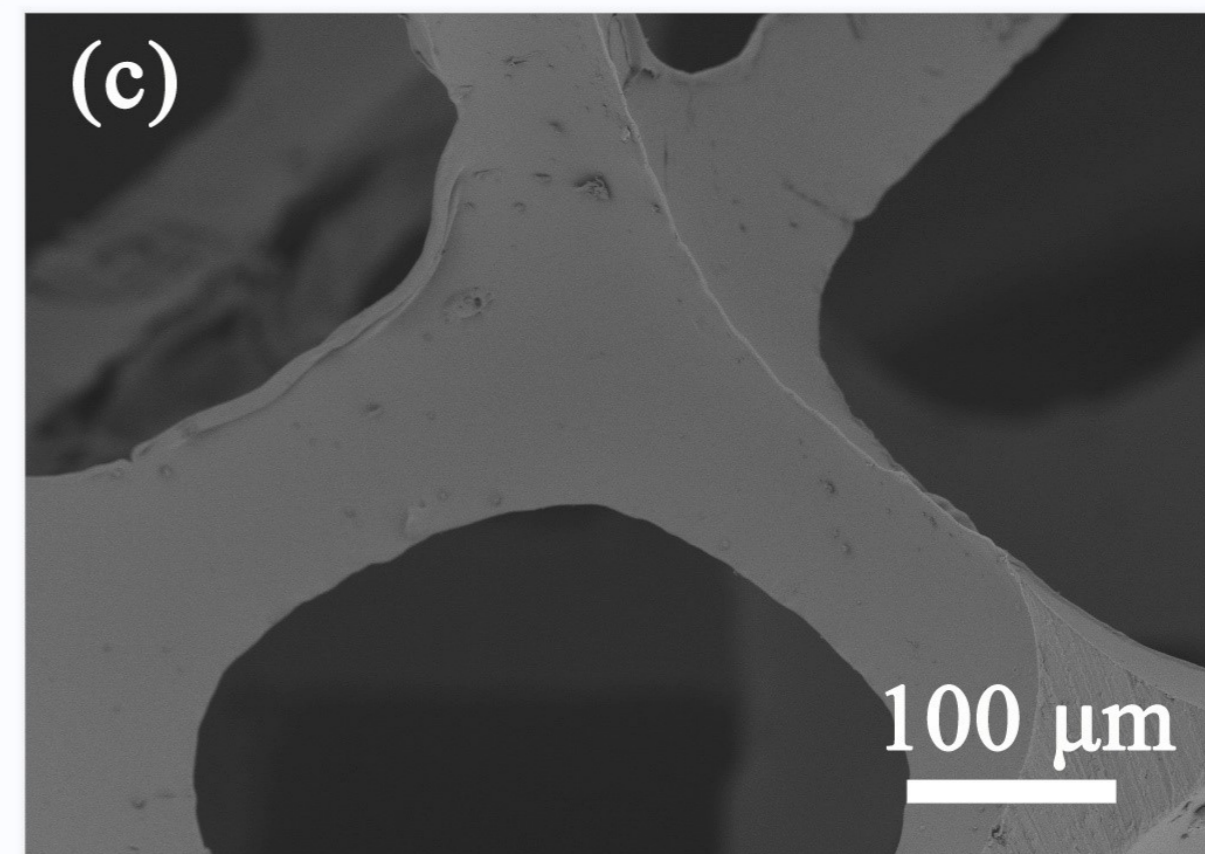

Supplement: d3nr04060g4.pdf [file d3nr04060g4.pdf]

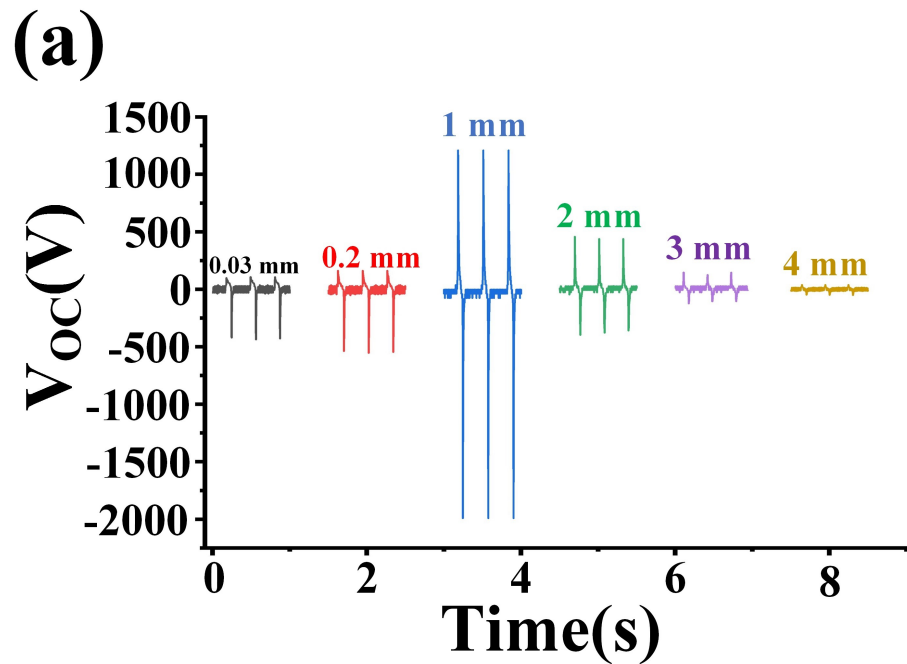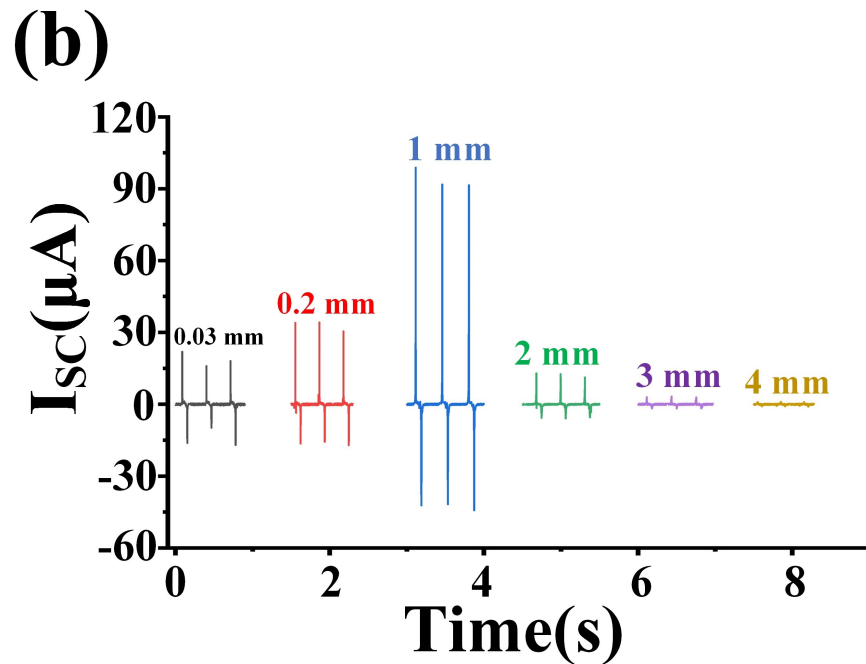

Supplement: d3nr04060g5.pdf [file d3nr04060g5.pdf]

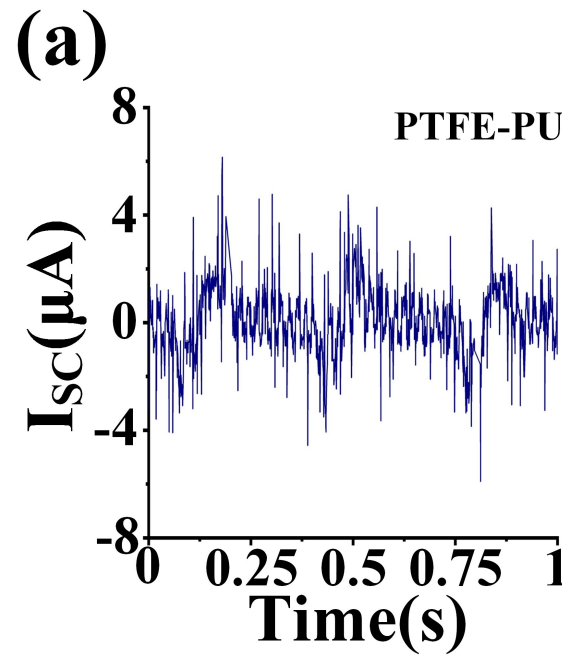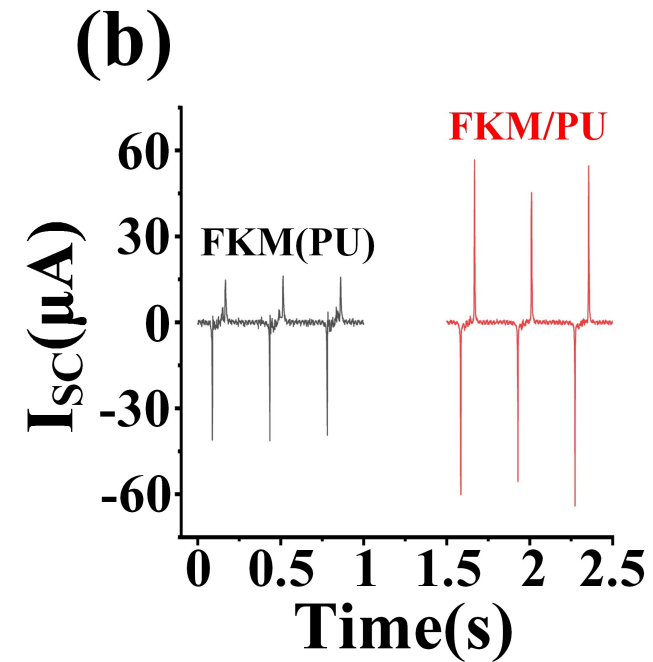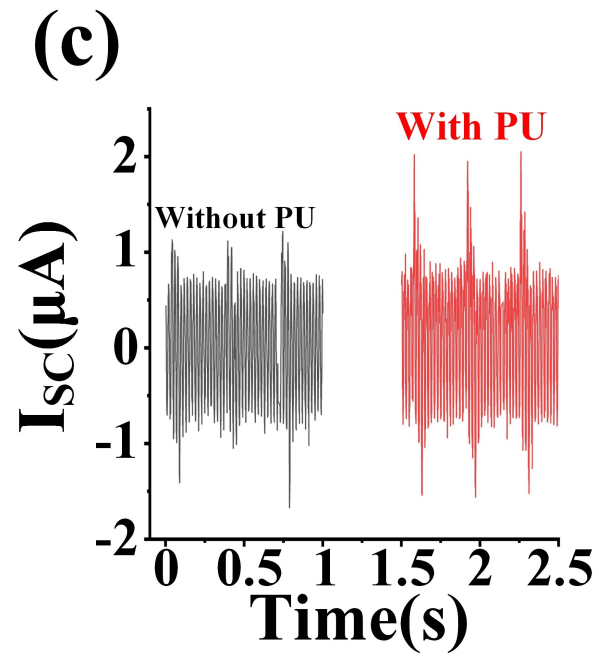

Supplement: d3nr04060g6.pdf [file d3nr04060g6.pdf]

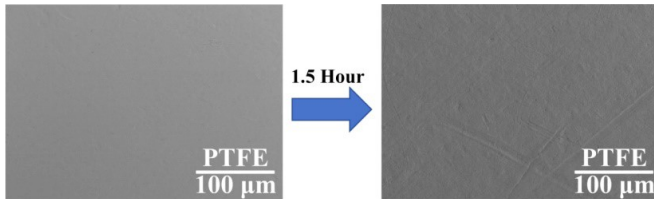

Supplement: d3nr04060g7.pdf [file d3nr04060g7.pdf]

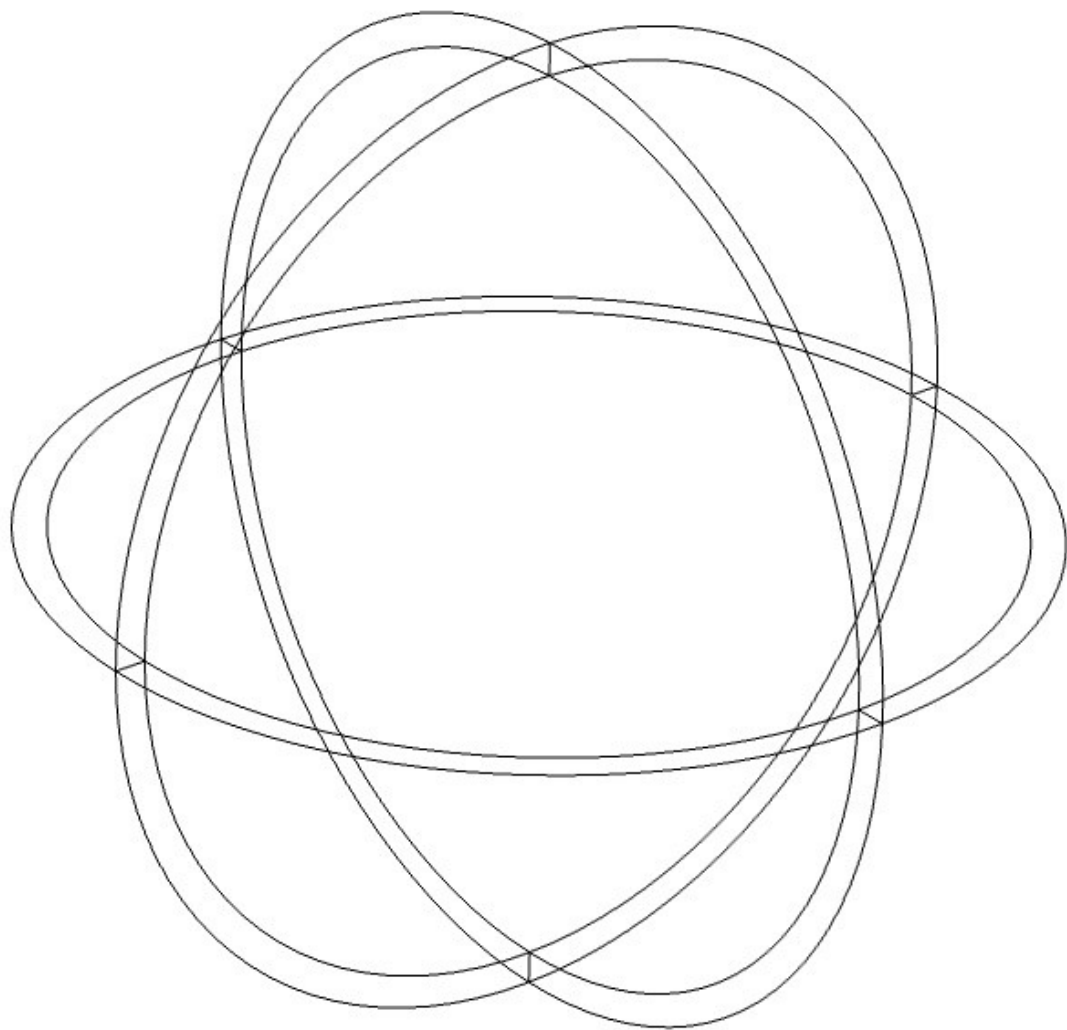

Supplement: d3nr04060g9.pdf [file d3nr04060g9.pdf]
